# Supplementary material for: Deconvoluting AMP-activated protein kinase (AMPK) adenine nucleotide binding and sensing
Source: PubMed Central journal article supplement (PMC5535039; doi:10.1074/jbc.m117.793018), 2017-06-14
Supplement: 10.1074_M117.793018_jbc.M117.793018-1.pdf [file 10.1074_M117.793018_jbc.M117.793018-1.pdf]

**Supplemental Table 2: HDX-MS protection summary of key AXP binding residue-containing peptides.** Numbers indicate % $\Delta$ HDX upon incubation of purified AMPK with indicated adenine nucleotide(s). Listed are MS-resolved peptides that contain the indicated AXP-binding residues.

|       |                                        | Wildtype holo-AMPK ( $\alpha_1\beta_2\gamma_1$ ) |            |                                                 |                                             | $\alpha_1$ -K47G, $\gamma_1$ -L129D/V130D/V276G/L277G (CBS4 only) | $\alpha_1$ -K47G, $\gamma_1$ -L129D/V130D/I312D (CBS3 only) | $\alpha_1$ -K47G, $\gamma_1$ -V276G/L277G/I312D (CBS1 only) |
|-------|----------------------------------------|--------------------------------------------------|------------|-------------------------------------------------|---------------------------------------------|-------------------------------------------------------------------|-------------------------------------------------------------|-------------------------------------------------------------|
| CBS   | Sub-site                               | 2.5 mM ATP                                       | 2.5 mM AMP | 40 $\mu$ M AMP<br>400 $\mu$ M ADP<br>4.5 mM ATP | 300 $\mu$ M AMP<br>1.0 mM ADP<br>3.8 mM ATP | 2.5 mM AMP                                                        |                                                             |                                                             |
| CBS-1 | $\beta$ -P: T87, T89<br>Ribose: D90    | -9                                               | +4         | -13                                             | -15                                         | +16                                                               | +14                                                         | -3                                                          |
|       | Adenine: K127, L129, V130              | -6                                               | 0          | -3                                              | -4                                          | N/A                                                               | N/A                                                         | -2                                                          |
|       | $\alpha$ -P: H151<br>$\gamma$ -P: R152 | N/A                                              | N/A        | N/A                                             | N/A                                         | N/A                                                               | N/A                                                         | N/A                                                         |
| CBS-3 | Ribose: D245                           | -2                                               | -16        | -6                                              | -7                                          | -18                                                               | -7                                                          | -13                                                         |
|       | Adenine: I240                          | -7                                               | -17        | -11                                             | -11                                         | -21                                                               | -11                                                         | -19                                                         |
|       | Adenine: V297                          | -6                                               | -9         | -7                                              | -9                                          | 2                                                                 | -1                                                          | 1                                                           |
|       | Adenine: V276+L277                     | N/A                                              | N/A        | N/A                                             | N/A                                         | -20                                                               | N/A                                                         | -17                                                         |
|       | $\alpha$ -P: R299                      | -6                                               | -9         | -7                                              | -9                                          | 2                                                                 | -1                                                          | 1                                                           |
|       | $\alpha$ -P: K170                      | -1                                               | 0          | -1                                              | -1                                          | N/A                                                               | 1                                                           | 0                                                           |
| CBS-4 | $\beta$ -P: L315+S316<br>Ribose: D317  | 1                                                | -1         | 0                                               | 0                                           | -1                                                                | -1                                                          | -2                                                          |
|       | Ribose: T200,                          | -8                                               | N/A        | -10                                             | -8                                          | -31                                                               | -15                                                         | -24                                                         |
|       | Adenine: A205                          | -7                                               | -16.5      | -10.5                                           | -10.5                                       | -20.5                                                             | -4                                                          | -12                                                         |
|       | Adenine: I312;                         | -3                                               | -8         | -4                                              | -3                                          | -9                                                                | N/A                                                         | N/A                                                         |
|       | Adenine: V225<br>$\alpha$ -P: S226     | -13                                              | -33.5      | -14                                             | -16                                         | -29                                                               | -6                                                          | -15                                                         |
|       | $\alpha$ -P: H151                      | N/A                                              | N/A        | N/A                                             | N/A                                         | N/A                                                               | N/A                                                         | N/A                                                         |
|       | $\gamma$ -P: R299                      | -6                                               | -9         | -7                                              | -9                                          | 2                                                                 | -1                                                          | 1                                                           |
