# Supplementary material for: Deconvoluting AMP-activated protein kinase (AMPK) adenine nucleotide binding and sensing
Source: PubMed Central journal article supplement (PMC5535039; doi:10.1074/jbc.m117.793018), 2017-06-14
Supplement: 10.1074_M117.793018_jbc.M117.793018-2.pdf [file 10.1074_M117.793018_jbc.M117.793018-2.pdf]

**Supplemental Table 1: Complete ΔHDX-MS peptide list for the γ1-subunit.** Resolved peptides are listed in the first column and % changes in HDX are indicated by numbers and heat map color.

| Sequence              | Charge | Start | END | WT α1β2γ1 AMPK without added nucleotides versus |            |                |            | CBS4 only | CBS3 only    | CBS1 only |
|-----------------------|--------|-------|-----|-------------------------------------------------|------------|----------------|------------|-----------|--------------|-----------|
|                       |        |       |     | 2.5 mM AMP                                      | 2.5 mM ATP | Non-stress AXP | Stress AXP |           | + 2.5 mM AMP |           |
|                       |        |       |     |                                                 |            |                |            |           |              |           |
| NEHPQETPESNNSVY       | 2      | 15    | 29  | N/A                                             | N/A        | N/A            | N/A        | 6 (3)     | 5 (4)*       | N/A       |
| MKSHRCYDLIPTSSKL      | 2      | 33    | 48  | 1 (3)*                                          | 2 (1)*     | 1 (1)          | 0 (1)*     | 2 (1)*    | 1 (1)        | 1 (1)     |
| VVFDLSL               | 1      | 49    | 55  | -1 (2)*                                         | 0 (1)*     | 0 (1)*         | 0 (0)*     | 0 (0)*    | 0 (0)        | 0 (0)*    |
| DTSLQVKKKAFF          | 2      | 52    | 62  | N/A                                             | 1 (2)*     | N/A            | -3 (2)     | 0 (2)*    | 0 (2)*       | 0 (1)     |
| QVKKAF                | 2      | 56    | 61  | N/A                                             | 0 (1)*     | N/A            | -1 (1)     | -1 (2)*   | 0 (1)*       | N/A       |
| QVKKKAFF              | 2      | 56    | 62  | 0 (1)*                                          | -1 (1)*    | 0 (1)          | 0 (1)      | -1 (0)*   | 0 (0)        | 0 (0)*    |
| LTITD                 | 1      | 86    | 90  | N/A                                             | N/A        | N/A            | N/A        | 20 (3)    | 16 (4)       | N/A       |
| LTITDF                | 1      | 86    | 91  | -9 (4)                                          | 4 (5)*     | -13 (2)        | -15 (2)    | 12 (2)    | 10 (2)       | -3 (2)    |
| FINILHRYYKSA          | 2      | 91    | 103 | N/A                                             | N/A        | N/A            | N/A        | -12 (4)   | -4 (3)       | N/A       |
| FINILHRYYKSA          | 3      | 91    | 103 | N/A                                             | -14 (2)    | -7 (3)         | -10 (2)    | -13 (3)   | -5 (3)       | -7 (2)    |
| FINILHRYYKSA          | 2      | 92    | 103 | -1 (2)                                          | -14 (2)    | -8 (2)         | -10 (2)    | -14 (2)   | -4 (3)       | -7 (2)    |
| INILHRYYKSA           | 3      | 92    | 103 | -2 (3)                                          | -14 (2)    | -8 (2)         | -10 (2)    | -14 (2)   | -5 (3)       | -7 (2)    |
| VQIYE                 | 1      | 104   | 108 | 3 (3)                                           | 12 (3)     | 8 (2)          | 9 (3)      | 8 (3)     | 5 (3)*       | 10 (2)    |
| VQIVEL                | 1      | 104   | 109 | N/A                                             | 6 (3)      | 5 (3)          | 5 (4)      | 2 (3)*    | 3 (3)        | 7 (2)     |
| LEEKTIET              | 1      | 109   | 116 | N/A                                             | -13 (4)    | -10 (2)        | -11 (2)    | -16 (3)   | -6 (3)       | -6 (1)    |
| LEEKTIET              | 2      | 109   | 116 | -7 (3)                                          | -12 (4)    | -10 (2)        | -11 (2)    | -16 (3)   | -7 (3)       | -6 (1)    |
| LEEKTIETWRE           | 3      | 109   | 119 | N/A                                             | -13 (4)    | N/A            | N/A        | -15 (4)   | -7 (3)       | N/A       |
| WREVYLQD              | 1      | 117   | 124 | N/A                                             | -6 (4)     | -4 (3)         | -6 (3)     | -2 (5)*   | 2 (3)        | -7 (3)    |
| WREVYLQD              | 2      | 117   | 124 | -10 (3)                                         | -7 (3)     | -7 (2)         | -7 (2)     | -3 (2)*   | 1 (3)        | -5 (2)    |
| SFKPLVC               | 2      | 125   | 131 | -6 (3)                                          | 0 (3)*     | -3 (3)         | -4 (4)     | N/A       | N/A          | -2 (2)    |
| FDVAVSL               | 1      | 139   | 145 | 0 (1)*                                          | 0 (1)*     | 0 (1)*         | 0 (1)*     | N/A       | 0 (0)        | 0 (0)     |
| YILTHKRILKF           | 2      | 165   | 175 | -1 (1)                                          | 1 (0)*     | -1 (0)         | -1 (0)     | N/A       | 1 (0)        | 0 (0)     |
| YILTHKRILKF           | 3      | 165   | 175 | -1 (1)*                                         | 0 (0)*     | -1 (0)         | -1 (0)     | N/A       | 1 (0)        | 0 (0)     |
| ILTHKRILKF            | 3      | 166   | 175 | -1 (2)*                                         | 0 (1)*     | -1 (1)         | -1 (1)*    | N/A       | 1 (1)*       | 0 (1)     |
| FITEFFKPEF            | 1      | 179   | 188 | -1 (4)*                                         | 2 (3)*     | 0 (3)          | -2 (3)     | N/A       | 5 (4)        | -2 (3)    |
| FITEFFKPEF            | 2      | 179   | 188 | -1 (3)*                                         | 2 (3)*     | -1 (3)         | -2 (3)     | N/A       | 4 (4)        | -3 (3)    |
| MSKSLEE               | 1      | 189   | 195 | -4 (2)                                          | N/A        | -6 (1)         | -6 (1)     | N/A       | -13 (4)      | N/A       |
| MSKSLEE               | 2      | 189   | 195 | -2 (2)                                          | N/A        | -7 (1)         | -7 (1)     | N/A       | -12 (3)      | -23 (2)   |
| LQIGT                 | 1      | 196   | 200 | -4 (2)                                          | N/A        | -8 (2)         | -7 (1)     | -27 (3)   | -16 (3)      | -26 (2)   |
| LQIGTY                | 1      | 196   | 201 | -8 (3)                                          | N/A        | -10 (1)        | -8 (1)     | -31 (4)   | -15 (2)      | -24 (3)   |
| YANIAM                | 1      | 201   | 206 | -7 (4)                                          | -14 (4)    | -9 (2)         | -10 (2)    | -19 (3)   | -4 (3)       | -10 (3)   |
| ANIAM                 | 1      | 202   | 206 | N/A                                             | -19 (3)    | -12 (4)        | -11 (3)    | -22 (3)   | N/A          | -14 (3)   |
| MVRTTTPVY             | 2      | 206   | 214 | -3 (3)*                                         | -14 (5)    | -4 (3)         | -5 (3)     | -19 (3)   | -8 (4)       | -19 (3)   |
| VRTTTPVY              | 1      | 207   | 214 | -6 (3)                                          | -17 (4)    | -6 (2)         | -6 (2)     | -24 (3)   | -10 (3)      | -22 (3)   |
| VRTTTPVY              | 2      | 207   | 214 | -3 (3)                                          | -17 (4)    | -6 (2)         | -6 (2)     | -24 (3)   | -10 (3)      | -20 (2)   |
| GIFVQHRVLSAL          | 2      | 218   | 228 | N/A                                             | -25 (3)    | N/A            | N/A        | N/A       | -6 (3)       | N/A       |
| VQHRVLSAL             | 1      | 221   | 228 | -13 (4)                                         | -34 (3)    | -14 (2)        | -16 (2)    | -29 (3)   | -6 (3)       | -15 (3)   |
| VQHRVLSAL             | 2      | 221   | 228 | -10 (4)                                         | -33 (4)    | -14 (3)        | -16 (2)    | -29 (3)   | -6 (4)       | -15 (3)   |
| PVVDEKGRVVD           | 3      | 229   | 239 | N/A                                             | -16 (4)    | -7 (2)         | -9 (1)     | -20 (3)   | -12 (4)      | N/A       |
| PVVDEKGRVVDI          | 3      | 229   | 240 | -9 (4)*                                         | -17 (4)    | -9 (1)         | -9 (1)     | -21 (3)   | -12 (3)      | -20 (2)   |
| PVVDEKGRVVDIYSKF      | 2      | 229   | 244 | -7 (2)                                          | -17 (3)    | -11 (1)        | -11 (1)    | -21 (2)   | -11 (2)      | -19 (2)   |
| KGRVVDIYSKF           | 3      | 234   | 244 | N/A                                             | N/A        | N/A            | N/A        | -20 (3)   | N/A          | -16 (2)   |
| IYSKF                 | 2      | 240   | 244 | N/A                                             | -18 (4)    | N/A            | N/A        | -15 (3)   | -9 (4)       | N/A       |
| DVINL                 | 1      | 245   | 249 | -2 (2)*                                         | -16 (2)    | -6 (1)         | -7 (1)     | -18 (1)   | -7 (3)       | -13 (1)   |
| AAEKTYNNL             | 2      | 250   | 258 | 0 (4)*                                          | -8 (3)     | -6 (3)         | -10 (3)    | -19 (4)   | 0 (4)        | -2 (4)    |
| AAEKTYNNLD            | 2      | 250   | 259 | N/A                                             | -11 (5)    | N/A            | N/A        | -22 (4)   | -3 (4)       | N/A       |
| DVSVTKALQHRSHY        | 3      | 259   | 272 | N/A                                             | N/A        | N/A            | N/A        | -24 (3)   | N/A          | N/A       |
| DVSVTKALQHRSHYFEGGGKC | 2      | 259   | 279 | N/A                                             | N/A        | N/A            | N/A        | -20 (4)   | N/A          | -17 (3)   |
| KCYLHETLET            | 2      | 278   | 287 | N/A                                             | -3 (2)*    | -4 (2)         | -3 (2)     | N/A       | -3 (2)*      | N/A       |
| YLHETL                | 1      | 280   | 285 | -4 (3)                                          | -5 (2)     | -4 (2)         | -5 (2)     | N/A       | -4 (2)       | N/A       |
| YLHETLET              | 2      | 280   | 287 | -1 (1)                                          | -3 (1)*    | -2 (1)         | -2 (1)     | -12 (2)   | -3 (1)       | -14 (2)   |
| HETLET                | 1      | 282   | 287 | N/A                                             | -3 (1)*    | -3 (1)         | -2 (1)     | -10 (1)   | -2 (1)       | -11 (1)   |
| ETIINRLVE             | 2      | 286   | 294 | -2 (1)                                          | 0 (4)*     | -1 (0)         | -1 (0)     | -2 (1)*   | -1 (0)       | -1 (1)    |
| IINRLVE               | 2      | 288   | 294 | -3 (1)                                          | -2 (1)*    | -2 (1)         | -2 (1)     | -2 (1)*   | 0 (1)        | -1 (1)    |
| IINRLVEA              | 2      | 288   | 295 | N/A                                             | -5 (2)*    | -5 (1)         | -5 (1)     | 4 (2)*    | 1 (1)        | 3 (2)     |
| AEVHRLV               | 2      | 295   | 302 | -6 (3)                                          | -9 (2)     | -7 (1)         | -9 (1)     | 2 (3)*    | -1 (2)       | 1 (3)     |
| AEVHRLVVDEND          | 3      | 295   | 307 | -4 (2)                                          | -6 (2)     | -5 (2)         | -6 (1)     | -1 (2)*   | -3 (2)       | -6 (1)    |
| AEVHRLVVDEND          | 2      | 295   | 307 | N/A                                             | -6 (2)     | -5 (2)         | -5 (1)     | -1 (2)*   | -2 (3)       | -5 (2)    |
| VDENDVVKGDVSL         | 2      | 303   | 315 | N/A                                             | N/A        | N/A            | N/A        | N/A       | -6 (2)       | N/A       |
| VDENDVVKGVLSL         | 2      | 303   | 315 | -3 (2)                                          | -8 (2)     | -4 (1)         | -3 (1)     | -9 (2)    | N/A          | N/A       |
| NDVVKG                | 1      | 306   | 311 | N/A                                             | -12 (5)    | N/A            | -7 (4)     | -8 (3)    | -9 (4)       | -8 (3)    |
| NDVVKGDVSL            | 2      | 306   | 315 | N/A                                             | N/A        | N/A            | N/A        | N/A       | -9 (2)       | -19 (1)   |
| DVVKGDVSL             | 2      | 307   | 315 | N/A                                             | N/A        | N/A            | N/A        | N/A       | -5 (3)       | -13 (3)   |
| VVKGVSL               | 2      | 308   | 315 | -3 (1)                                          | -10 (2)    | -5 (1)         | -4 (1)     | -12 (1)   | N/A          | N/A       |
| VVKGDVSL              | 2      | 308   | 315 | N/A                                             | N/A        | N/A            | N/A        | N/A       | -9 (3)       | -20 (2)   |
| SDILQA                | 1      | 316   | 321 | 1 (1)*                                          | -1 (0)*    | 0 (1)*         | 0 (0)*     | -1 (0)*   | -1 (0)       | -2 (0)    |
| QALVLTGGGEKPP         | 2      | 320   | 331 | N/A                                             | 2 (4)*     | 2 (3)          | 0 (3)      | 1 (4)*    | 4 (3)        | -2 (3)    |
| ALVLTGGGEKPP          | 2      | 321   | 331 | N/A                                             | 2 (5)*     | N/A            | N/A        | 2 (3)*    | 3 (4)        | -1 (3)    |
| LVLTTGGGEKPP          | 2      | 322   | 331 | 0 (4)*                                          | 2 (4)*     | 3 (4)          | 1 (3)      | 3 (3)*    | 4 (4)        | -1 (4)    |
| LVLTTGGGEKPP          | 3      | 322   | 331 | 1 (4)                                           | 3 (4)*     | 2 (4)          | -1 (3)*    | 4 (3)*    | 4 (4)        | 0 (4)     |
