# Supplementary material for: Deconvoluting AMP-activated protein kinase (AMPK) adenine nucleotide binding and sensing
Source: PubMed Central journal article supplement (PMC5535039; doi:10.1074/jbc.m117.793018), 2017-06-14
Supplement: 10.1074_M117.793018_jbc.M117.793018-3.pdf [file 10.1074_M117.793018_jbc.M117.793018-3.pdf]

**Supplemental Table 3: ΔHDX-MS peptide list for the α1- and β2-subunits.** Resolved peptides are listed in the first column and % changes in HDX are indicated by numbers and heat map color.**Wild Type α1**

| Sequence                     | Charge | Start | End | 2.5mM AMP     |               |               |               | 2.5mM ATP     |               |                |                | 4.5mM ATP<br>0.4mM ADP<br>0.04mM AMP<br>(Non-stress<br>AXP mixture) |                | 3.8mM ATP<br>1.0mM ADP<br>0.3mM AMP<br>(Energy stress<br>AXP mixture) |  |
|------------------------------|--------|-------|-----|---------------|---------------|---------------|---------------|---------------|---------------|----------------|----------------|---------------------------------------------------------------------|----------------|-----------------------------------------------------------------------|--|
|                              |        |       |     | WT AMP alpha1 | WT AMP alpha1 | WT AMP alpha1 | WT AMP alpha1 | WT ATP alpha1 | WT ATP alpha1 | WT Mix1 alpha1 | WT Mix1 alpha1 | WT Mix2 alpha1                                                      | WT Mix2 alpha1 |                                                                       |  |
| FRHPHIKL                     | 2      | 3     | 88  | 96            | -5 (1)        | -6 (2)        | -6 (1)        | -6 (1)        | -6 (1)        | -6 (1)         | -6 (1)         | -6 (1)                                                              |                |                                                                       |  |
| FRHPHIKL                     | 3      | 3     | 88  | 96            | -6 (1)        | -6 (1)        | -6 (1)        | -6 (1)        | -6 (1)        | -6 (1)         | -6 (1)         | -6 (1)                                                              |                |                                                                       |  |
| YQVISTPSD                    | 1      | 1     | 97  | 105           | 7 (3)         | 2 (4)*        | 4 (2)         | 3 (2)         | 4 (2)         | 3 (2)          | 4 (2)          | 3 (2)                                                               |                |                                                                       |  |
| YQVISTPSDIF                  | 1      | 1     | 97  | 107           | 5 (3)         | 1 (3)         | 2 (2)         | 2 (2)         | 2 (2)         | 2 (2)          | 2 (2)          | 2 (2)                                                               |                |                                                                       |  |
| YQVISTPSDIF                  | 2      | 2     | 97  | 107           | 5 (3)         | 1 (3)         | 3 (2)         | 3 (2)         | 3 (2)         | 2 (2)          | 3 (2)          | 2 (2)                                                               |                |                                                                       |  |
| YVSGGEL                      | 1      | 1     | 112 | 118           | -9 (2)        | -11 (3)       | -10 (2)       | -10 (2)       | -10 (2)       | -11 (3)        | -10 (2)        | -11 (3)                                                             |                |                                                                       |  |
| FDYICKNGRL                   | 2      | 2     | 119 | 128           | -7 (3)        | -10 (4)       | -9 (2)        | -9 (2)        | -9 (2)        | -10 (3)        | -9 (2)         | -10 (3)                                                             |                |                                                                       |  |
| FDYICKNGRL                   | 3      | 3     | 119 | 128           | -9 (4)        | -7 (4)        | -10 (2)       | -10 (2)       | -10 (2)       | N/A            | -10 (2)        | N/A                                                                 |                |                                                                       |  |
| DAHMMNAKIADFGLSNM            | 2      | 2     | 165 | 180           | -12 (3)       | -28 (4)       | -19 (2)       | -19 (2)       | -19 (2)       | -18 (4)        | -19 (2)        | -18 (4)                                                             |                |                                                                       |  |
| DAHMMNAKIADFGLSNM            | 3      | 3     | 165 | 180           | -13 (3)       | -24 (4)       | -18 (2)       | -18 (2)       | -18 (2)       | -18 (3)        | -18 (2)        | -18 (3)                                                             |                |                                                                       |  |
| NAKIADFGLSNM                 | 1      | 1     | 169 | 180           | -7 (4)        | -25 (5)       | -15 (4)       | -15 (4)       | -15 (4)       | -16 (4)        | -15 (4)        | -16 (4)                                                             |                |                                                                       |  |
| NAKIADFGLSNM                 | 2      | 2     | 169 | 180           | -7 (3)        | -23 (5)       | -16 (3)       | -16 (3)       | -16 (3)       | -16 (3)        | -16 (3)        | -16 (3)                                                             |                |                                                                       |  |
| FGLSNM                       | 1      | 1     | 175 | 180           | 1 (4)*        | -25 (5)       | N/A           | N/A           | N/A           | -11 (4)        | N/A            | -11 (4)                                                             |                |                                                                       |  |
| LRTSCGSPNYAAPEVISGRL         | 3      | 3     | 187 | 206           | -4 (4)        | -15 (5)       | -12 (3)       | -12 (3)       | -12 (3)       | -11 (4)        | -12 (3)        | -11 (4)                                                             |                |                                                                       |  |
| YAGPEVDIWSSG                 | 1      | 1     | 207 | 218           | -8 (3)        | -13 (3)       | -11 (1)       | -11 (1)       | -11 (1)       | -11 (2)        | -11 (1)        | -11 (2)                                                             |                |                                                                       |  |
| IWSSGVIL                     | 1      | 1     | 214 | 221           | N/A           | -10 (3)       | -8 (1)        | -8 (1)        | -8 (1)        | -8 (1)         | -8 (1)         | -8 (1)                                                              |                |                                                                       |  |
| ALLCGTLPFDDDDHVPTL           | 2      | 2     | 223 | 239           | 0 (2)         | N/A           | -2 (2)        | -2 (2)        | -2 (2)        | -2 (2)         | -2 (2)         | -2 (2)                                                              |                |                                                                       |  |
| LCGTLPFDDDDHVPTL             | 2      | 2     | 225 | 239           | 2 (3)         | N/A           | 0 (2)         | 0 (2)         | 0 (2)         | 0 (2)          | 0 (2)          | 0 (2)                                                               |                |                                                                       |  |
| CGTLPFDDDDHVPTL              | 2      | 2     | 226 | 239           | 3 (3)         | -1 (3)        | 0 (3)         | 0 (3)         | 0 (3)         | -1 (2)         | 0 (3)          | -1 (2)                                                              |                |                                                                       |  |
| FKKICDGIF                    | 1      | 1     | 240 | 248           | 10 (4)        | 8 (3)         | 10 (3)        | 10 (3)        | 10 (3)        | 8 (3)          | 10 (3)         | 8 (3)                                                               |                |                                                                       |  |
| FKKICDGIF                    | 3      | 3     | 240 | 248           | 10 (3)        | 8 (4)         | N/A           | N/A           | N/A           | 7 (3)          | N/A            | 7 (3)                                                               |                |                                                                       |  |
| IREHEWFKQDLPKYLF             | 4      | 4     | 279 | 294           | N/A           | -6 (3)        | -5 (2)        | -5 (2)        | -5 (2)        | -5 (3)         | -5 (2)         | -5 (3)                                                              |                |                                                                       |  |
| IREHEWFKQDLPKYLPEDPSY        | 4      | 4     | 279 | 300           | 1 (4)         | N/A           | -1 (3)        | -1 (3)        | -1 (3)        | -2 (3)         | -1 (3)         | -2 (3)                                                              |                |                                                                       |  |
| FKQDLPKYLPEDPSYSSTM          | 3      | 3     | 285 | 304           | 9 (4)         | N/A           | N/A           | N/A           | N/A           | 5 (3)          | N/A            | 5 (3)                                                               |                |                                                                       |  |
| IDDEALKEVCE                  | 2      | 2     | 305 | 315           | -1 (1)        | N/A           | -2 (1)        | -2 (1)        | -2 (1)        | -2 (1)         | -2 (1)         | -2 (1)                                                              |                |                                                                       |  |
| YNRNHQDPLAVAY                | 2      | 2     | 329 | 341           | 2 (3)         | -2 (3)        | 0 (2)         | 0 (2)         | 0 (2)         | 0 (2)          | 0 (2)          | 0 (2)                                                               |                |                                                                       |  |
| YNRNHQDPLAVAY                | 3      | 3     | 329 | 341           | 2 (3)*        | -1 (3)*       | 0 (2)         | 0 (2)         | 0 (2)         | 0 (2)          | 0 (2)          | 0 (2)                                                               |                |                                                                       |  |
| YNRNHQDPLAVAYHLIIDNRRIMNE    | 4      | 4     | 329 | 353           | N/A           | -3 (3)        | N/A           | N/A           | N/A           | -1 (2)         | N/A            | -1 (2)                                                              |                |                                                                       |  |
| YNRNHQDPLAVAYHLIIDNRRIMNEAKD | 4      | 4     | 329 | 356           | 2 (3)*        | -2 (5)*       | -1 (2)        | -1 (2)        | -1 (2)        | -2 (2)         | -1 (2)         | -2 (2)                                                              |                |                                                                       |  |
| HLIIDN                       | 1      | 1     | 342 | 347           | N/A           | N/A           | N/A           | N/A           | N/A           | -4 (2)         | N/A            | -4 (2)                                                              |                |                                                                       |  |
| FYLATSPDPSF                  | 1      | 1     | 357 | 367           | 12 (5)        | 4 (4)         | 7 (5)         | 7 (5)         | 7 (5)         | 4 (3)          | 7 (5)          | 4 (3)                                                               |                |                                                                       |  |
| FYLATSPDPSF                  | 2      | 2     | 357 | 367           | 8 (5)         | N/A           | N/A           | N/A           | N/A           | 5 (3)          | N/A            | 5 (3)                                                               |                |                                                                       |  |
| FYLATSPDPSFL                 | 2      | 2     | 357 | 368           | 9 (5)         | N/A           | 5 (5)         | 5 (5)         | 5 (5)         | 4 (3)          | 5 (5)          | 4 (3)                                                               |                |                                                                       |  |
| YLATSPDPSF                   | 1      | 1     | 358 | 367           | 11 (5)        | N/A           | 7 (5)         | 7 (5)         | 7 (5)         | N/A            | 7 (5)          | N/A                                                                 |                |                                                                       |  |
| YLATSPDPSFL                  | 1      | 1     | 358 | 368           | 10 (5)        | 4 (5)*        | 6 (5)         | 6 (5)         | 6 (5)         | 4 (4)*         | 6 (5)          | 4 (4)*                                                              |                |                                                                       |  |
| AEVCRAIKQLD                  | 2      | 2     | 428 | 438           | -1 (2)*       | N/A           | N/A           | N/A           | N/A           | 0 (3)          | N/A            | 0 (3)                                                               |                |                                                                       |  |
| AEVCRAIKQLDYE                | 2      | 2     | 428 | 440           | 0 (0)*        | N/A           | N/A           | N/A           | N/A           | 0 (1)*         | N/A            | 0 (1)*                                                              |                |                                                                       |  |
| IKQLDYE                      | 2      | 2     | 434 | 440           | 0 (1)*        | N/A           | N/A           | N/A           | N/A           | 0 (2)          | N/A            | 0 (2)                                                               |                |                                                                       |  |
| WKV/NPYYL                    | 2      | 2     | 441 | 449           | 1 (2)*        | N/A           | N/A           | N/A           | N/A           | 1 (2)*         | N/A            | 1 (2)*                                                              |                |                                                                       |  |
| YSKMSLQL                     | 1      | 1     | 461 | 468           | 1 (2)*        | 0 (3)*        | 1 (2)*        | 1 (2)*        | 1 (2)*        | 0 (2)*         | 1 (2)*         | 0 (2)*                                                              |                |                                                                       |  |
| YSKMSLQL                     | 2      | 2     | 461 | 468           | 0 (1)         | -1 (2)*       | 0 (1)*        | 0 (1)*        | 0 (1)*        | 0 (0)*         | 0 (1)*         | 0 (0)*                                                              |                |                                                                       |  |
| YQVDSRT                      | 2      | 2     | 469 | 475           | 3 (4)         | 3 (3)*        | 1 (3)*        | 1 (3)*        | 1 (3)*        | 1 (3)*         | 1 (3)*         | 1 (3)*                                                              |                |                                                                       |  |
| YQVDSRTYL                    | 2      | 2     | 469 | 477           | 2 (2)         | 1 (2)*        | 1 (2)*        | 1 (2)*        | 1 (2)*        | 1 (2)*         | 1 (2)*         | 1 (2)*                                                              |                |                                                                       |  |
| DSSPDLTPRPGSHTIEF            | 2      | 2     | 535 | 552           | 6 (3)         | 4 (2)         | 4 (1)         | 4 (1)         | 4 (1)         | 4 (2)          | 4 (1)          | 4 (2)                                                               |                |                                                                       |  |
| FEMCANL                      | 1      | 1     | 553 | 559           | 0 (1)*        | -1 (2)*       | 0 (1)*        | 0 (1)*        | 0 (1)*        | 0 (1)*         | 0 (1)*         | 0 (1)*                                                              |                |                                                                       |  |
| IKLAQ                        | 2      | 2     | 560 | 565           | 0 (1)*        | 1 (1)*        | 0 (1)         | 0 (1)         | 0 (1)         | 0 (0)*         | 0 (1)          | 0 (0)*                                                              |                |                                                                       |  |

**Wild Type  $\beta 2$**

**2.5mM  
AMP**

**2.5mM  
ATP**

**(mix 1)  
4.5mM ATP  
0.4mM ADP  
0.04mM AMP**

**(mix 2)  
3.8mM ATP  
1.0mM ADP  
0.3mM AMP**

| Sequence          | Charge | Start | End | WT AMP beta2 | WT ATP beta2 | WT Mix1 beta2 | WT Mix2 beta2 |
|-------------------|--------|-------|-----|--------------|--------------|---------------|---------------|
| FSLPDSKLPGDKE     |        | 3     | 46  | 58 6 (5)*    | 3 (5)*       | 4 (5)         | 4 (4)*        |
| FSLPDSKLPGDKEF    |        | 3     | 46  | 59 N/A       | N/A          | 6 (4)         | N/A           |
| FVSWQQDLED        |        | 1     | 59  | 68 9 (5)*    | 4 (5)*       | 6 (4)         | 5 (5)         |
| VFISGSFNNW        |        | 1     | 90  | 99 N/A       | -8 (4)       | -2 (4)*       | -6 (3)        |
| ISGSFNNW          |        | 1     | 92  | 99 -12 (5)   | -7 (3)       | -7 (3)        | -9 (3)        |
| NNWSTKIPLIKSHNDF  |        | 1     | 97  | 112 -5 (4)   | N/A          | -5 (3)        | N/A           |
| STKIPLIKSHNDF     |        | 2     | 100 | 112 -3 (4)   | -4 (3)       | -2 (2)        | -2 (2)        |
| STKIPLIKSHNDF     |        | 3     | 100 | 112 -3 (3)   | -4 (4)       | -2 (2)        | -2 (2)        |
| STKIPLIKSHNDF     |        | 4     | 100 | 112 -3 (4)*  | N/A          | -1 (3)        | 2 (3)         |
| VAIDLPEGEHQYKF    |        | 2     | 113 | 127 -3 (3)   | -3 (3)       | -3 (2)        | -3 (2)        |
| VAIDLPEGEHQYKF    |        | 3     | 113 | 127 -3 (2)   | -4 (3)       | -3 (2)        | -3 (2)        |
| LDLPEGEHQYKF      |        | 2     | 116 | 127 -6 (4)   | -7 (4)       | -7 (3)        | -6 (3)        |
| LDLPEGEHQYKF      |        | 3     | 116 | 127 -7 (4)   | -4 (5)       | -5 (3)        | -7 (3)        |
| FVDGGQVHDPSEPVWT  |        | 2     | 128 | 143 -10 (5)  | -8 (4)       | -8 (2)        | -9 (3)        |
| WVHDPSEPVVT       |        | 2     | 133 | 143 -10 (5)  | N/A          | N/A           | N/A           |
| WVHDPSEPVVTSQL    |        | 2     | 133 | 146 -6 (4)   | -6 (4)       | -5 (4)        | -6 (4)        |
| GTINLIHVKKSDF     |        | 2     | 147 | 160 -4 (3)   | -5 (4)*      | -4 (4)        | -5 (4)        |
| GTINLIHVKKSDF     |        | 3     | 147 | 160 -4 (3)   | -4 (4)*      | -4 (4)*       | -6 (3)        |
| LIHVKKSDF         |        | 2     | 152 | 160 2 (4)    | 0 (4)*       | 0 (4)*        | -1 (3)*       |
| IHVKKSDF          |        | 2     | 153 | 160 4 (3)    | 1 (4)*       | 3 (4)*        | 1 (3)*        |
| DALKLDSM          |        | 1     | 164 | 171 9 (5)    | N/A          | 7 (4)         | 5 (4)*        |
| FRSEERFKSPPILPPLL |        | 3     | 196 | 212 5 (3)    | N/A          | N/A           | 2 (3)*        |
| VILNKDTNISCD      |        | 2     | 215 | 226 N/A      | N/A          | N/A           | 2 (4)*        |
| PALLPEPNHVMLNHL   |        | 2     | 227 | 241 3 (3)    | 0 (4)*       | 2 (2)         | 1 (2)*        |
| PALLPEPNHVMLNHL   |        | 3     | 227 | 241 3 (3)    | 2 (3)*       | 2 (2)         | 1 (2)*        |
| YALSIKDSVM        |        | 2     | 242 | 251 8 (3)    | 2 (3)*       | 3 (3)         | 2 (3)*        |
| YALSIKDSVMVL      |        | 2     | 242 | 253 6 (3)    | 1 (3)*       | 2 (2)*        | 2 (2)*        |
| SATHRYKGGYVTTLL   |        | 2     | 254 | 267 1 (1)    | N/A          | 0 (1)*        | 0 (0)*        |
| SATHRYKGGYVTTLL   |        | 3     | 254 | 267 1 (1)    | 0 (2)*       | 0 (1)*        | 0 (0)*        |
| SATHRYKGGYVTTLL   |        | 2     | 254 | 268 1 (1)    | N/A          | N/A           | 0 (1)*        |
| SATHRYKGGYVTTLL   |        | 3     | 254 | 268 1 (1)    | 0 (2)*       | 0 (0)*        | 0 (0)         |
| LYKPI             |        | 1     | 268 | 272 0 (4)*   | N/A          | N/A           | -1 (3)*       |
| LYKPI             |        | 2     | 268 | 272 0 (2)*   | 1 (2)*       | -2 (3)*       | -1 (3)*       |
